# Supplementary material for: The Use of Music to Manage Burnout in Nurses: A Systematic Review
Source: PubMed Central journal article supplement — Am J Health Promot. 2022 May 27;36(8):1386–98. doi: 10.1177/08901171221105862 (PMC9619252; doi:10.1177/08901171221105862), 2022-05-27
Supplement: sj-pdf-1-ahp-10.1177_08901171221105862.pdf [file sj-pdf-1-ahp-10.1177_08901171221105862.pdf]

## Appendix

**Table A1.** Search strategy.

| #  | Searches                                                                                                                                     |
|----|----------------------------------------------------------------------------------------------------------------------------------------------|
| 1  | exp Music Therapy/ or exp Music/                                                                                                             |
| 2  | exp Singing/                                                                                                                                 |
| 3  | (music or sing or sing or singing or song* or rap or jazz or classical or hip hop or rhythm* or harmony or melody or melodies or vocal*).mp. |
| 4  | 1 or 2 or 3                                                                                                                                  |
| 5  | exp Burnout, Psychological/                                                                                                                  |
| 6  | exp Mental Fatigue/ or exp Compassion Fatigue/                                                                                               |
| 7  | (burnout or burn-out or burn out or mental fatigue or compassion fatigue or exhaustion).mp.                                                  |
| 8  | 5 or 6 or 7                                                                                                                                  |
| 9  | 4 and 8                                                                                                                                      |
| 10 | limit 9 to english language                                                                                                                  |
| 11 | remove duplicates from 10                                                                                                                    |

**Table A2.** Excluded studies and reasons for exclusion.

| <b>Study ID</b>                   | <b>Reasons for Exclusion</b> |
|-----------------------------------|------------------------------|
| Field (1997) <sup>1</sup>         | Wrong population             |
| Lambert (2004) <sup>2</sup>       | Wrong study design           |
| Tracy (2005) <sup>3</sup>         | Wrong outcome                |
| Chang (2006) <sup>4</sup>         | Wrong study design           |
| Repar (2007) <sup>5</sup>         | Wrong publication type       |
| Schwarzkopf (2007) <sup>6</sup>   | Wrong publication type       |
| Rose (2009) <sup>7</sup>          | Wrong study design           |
| Van der Colff (2009) <sup>8</sup> | Wrong study design           |
| Brooks (2010) <sup>9</sup>        | Wrong population             |
| Logid (2011) <sup>10</sup>        | Wrong publication type       |
| Sonke (2015) <sup>11</sup>        | Wrong outcome                |
| Karpavičiūtė (2016) <sup>12</sup> | Wrong study design           |
| Phillips (2017) <sup>13</sup>     | Wrong publication type       |
| Catlin (2019) <sup>14</sup>       | Wrong population             |
| Veiga (2019) <sup>15</sup>        | Wrong study design           |
| Bianchini (2020) <sup>16</sup>    | Wrong study design           |
| Zamanifar (2020) <sup>17</sup>    | Wrong study design           |

**Table A3.** Newcastle-Ottawa Scale (NOS) – for cohort study.

| Study                                             | Selection                                    |                                         |                               |                                                                              |                                                                     | Comparability             | Outcome                                             |                                      | Total Score |
|---------------------------------------------------|----------------------------------------------|-----------------------------------------|-------------------------------|------------------------------------------------------------------------------|---------------------------------------------------------------------|---------------------------|-----------------------------------------------------|--------------------------------------|-------------|
|                                                   | Representativeness of the exposed cohort (1) | Selection of the non-exposed cohort (1) | Ascertainment of exposure (1) | Demonstration that outcome of interest was not present at start of study (1) | Comparability of cohorts on the basis of the design or analysis (2) | Assessment of outcome (1) | Was follow-up long enough for outcomes to occur (1) | Adequacy of follow-up of cohorts (1) |             |
| <b>Studies with music only</b>                    |                                              |                                         |                               |                                                                              |                                                                     |                           |                                                     |                                      |             |
| Phillips (2020) <sup>18</sup>                     | *                                            | *                                       | *                             | *                                                                            |                                                                     |                           | *                                                   | *                                    | 6           |
| <b>Studies with music and other interventions</b> |                                              |                                         |                               |                                                                              |                                                                     |                           |                                                     |                                      |             |
| Davis (2005) <sup>19</sup>                        | *                                            |                                         | *                             | *                                                                            |                                                                     |                           | *                                                   |                                      | 4           |
| Cooke (2007) <sup>20</sup>                        | *                                            |                                         | *                             | *                                                                            |                                                                     |                           | *                                                   |                                      | 4           |
| Ceravolo (2019) <sup>21</sup>                     | *                                            |                                         | *                             | *                                                                            |                                                                     |                           | *                                                   | *                                    | 5           |
| Semerci (2020) <sup>22</sup>                      | *                                            |                                         |                               | *                                                                            |                                                                     |                           | *                                                   | *                                    | 4           |

**Table A4.** Newcastle-Ottawa Scale (NOS) – for cross-sectional study.

| Study                                             | Selection                            |                 |                     |                               | Comparability                                                        | Outcome                   |                      | Total Score |
|---------------------------------------------------|--------------------------------------|-----------------|---------------------|-------------------------------|----------------------------------------------------------------------|---------------------------|----------------------|-------------|
|                                                   | Representativeness of the sample (1) | Sample size (1) | Non-respondents (1) | Ascertainment of exposure (2) | Comparability of subjects on the basis of the design or analysis (2) | Assessment of outcome (2) | Statistical test (1) |             |
| <b>Studies with music only</b>                    |                                      |                 |                     |                               |                                                                      |                           |                      |             |
| Rose (2006) <sup>23</sup>                         |                                      |                 | *                   |                               |                                                                      | *                         |                      | 2           |
| Cutshall (2010) <sup>24</sup>                     | *                                    |                 | *                   |                               |                                                                      | **                        |                      | 4           |
| Rose (2010) <sup>25</sup>                         | *                                    |                 | *                   |                               |                                                                      | *                         |                      | 3           |
| Happell (2013) <sup>26</sup>                      | *                                    |                 | *                   |                               |                                                                      | *                         |                      | 3           |
| Jordan (2016) <sup>27</sup>                       | *                                    |                 | *                   |                               | **                                                                   |                           |                      | 4           |
| Oates (2018) <sup>28</sup>                        | *                                    |                 | *                   |                               |                                                                      | *                         |                      | 3           |
| <b>Studies with music and other interventions</b> |                                      |                 |                     |                               |                                                                      |                           |                      |             |
| Tuisku (2016) <sup>29</sup>                       | *                                    |                 | *                   |                               | **                                                                   | *                         | *                    | 6           |

**Table A5.** JBI Critical Appraisal Checklist for Randomized Controlled Trials.

|                                                                                                                                                                                           | Lai<br>(2011)<br>30 | Ploukou<br>(2021)<br>31 | W.J<br>(2021)<br>32 | Ozgundon<br>du<br>(2019)<br>33 |
|-------------------------------------------------------------------------------------------------------------------------------------------------------------------------------------------|---------------------|-------------------------|---------------------|--------------------------------|
| 1. Was true randomization used for assignment of participants to treatment groups?                                                                                                        | Yes                 | Yes                     | Yes                 | Yes                            |
| 2. Was allocation to treatment groups concealed?                                                                                                                                          | Unclear             | Unclear                 | Unclear             | Yes                            |
| 3. Were treatment groups similar at the baseline?                                                                                                                                         | Yes                 | Unclear                 | Yes                 | Yes                            |
| 4. Were participants blind to treatment assignment?                                                                                                                                       | No                  | No                      | No                  | No                             |
| 5. Were those delivering treatment blind to treatment assignment?                                                                                                                         | No                  | No                      | No                  | No                             |
| 6. Were outcomes assessors blind to treatment assignment?                                                                                                                                 | Unclear             | Unclear                 | Unclear             | Unclear                        |
| 7. Were treatment groups treated identically other than the intervention of interest?                                                                                                     | Yes                 | Yes                     | Yes                 | Yes                            |
| 8. Was follow up complete and if not, were differences between groups in terms of their follow up adequately described and analyzed?                                                      | Yes                 | Yes                     | Yes                 | Yes                            |
| 9. Were participants analyzed in the groups to which they were randomized?                                                                                                                | Yes                 | Yes                     | Yes                 | Yes                            |
| 10. Were outcomes measured in the same way for treatment groups?                                                                                                                          | Yes                 | Yes                     | Yes                 | Yes                            |
| 11. Were outcomes measured in a reliable way?                                                                                                                                             | Yes                 | Yes                     | Yes                 | Yes                            |
| 12. Was appropriate statistical analysis used?                                                                                                                                            | Yes                 | Yes                     | Yes                 | Yes                            |
| 13. Was the trial design appropriate, and any deviations from the standard RCT design (individual randomization, parallel groups) accounted for in the conduct and analysis of the trial? | Yes                 | Yes                     | Yes                 | Yes                            |
| Overall appraisal: Include/Exclude                                                                                                                                                        | Include             | Include                 | Include             | Include                        |

## References

1. Field T, Quintino O, Henteleff T, Wells-Keife L, Delvecchio-Feinberg G. Job stress reduction therapies. *Altern Ther Health Med*. 1997;3(4):54-56.
2. Lambert VA, Lambert CE, Ito M. Workplace stressors, ways of coping and demographic characteristics as predictors of physical and mental health of Japanese hospital nurses. *International Journal of Nursing Studies*. 2004;41(1):85-97. doi:10.1016/S0020-7489(03)00080-4
3. Tracy MF, Lindquist R, Savik K, et al. Use of Complementary and Alternative Therapies: A National Survey of Critical Care Nurses. *American Journal of Critical Care*. 2005;14(5):404-415. doi:10.4037/ajcc2005.14.5.404
4. Chang EM, Daly JW, Hancock KM, et al. The Relationships Among Workplace Stressors, Coping Methods, Demographic Characteristics, and Health in Australian Nurses. *Journal of Professional Nursing*. 2006;22(1):30-38. doi:10.1016/j.profnurs.2005.12.002
5. Repar PA, Patton D. Stress Reduction for Nurses Through Arts-in-Medicine at the University of New Mexico Hospitals. *Holistic Nursing Practice*. 2007;21(4):182-186. doi:10.1097/01.HNP.0000280929.68259.5c
6. Schwarzkopf R, Brown C, Silkin R, Toby-Harris L, Torres M, Voss D. Caring for self: Promoting Personal Wellness for Nursing Leaders in the Hospital Environment. *Nurse Leader*. 2007;5(5):34-46. doi:10.1016/j.mnl.2007.07.010
7. Rose J, Glass N. An investigation of emotional wellbeing and its relationship to contemporary nursing practice. *Collegian*. 2009;16(4):185-192. doi:10.1016/j.colegn.2009.08.001
8. Van der Colff JJ, Rothmann S. Occupational stress, sense of coherence, coping, burnout and work engagement of registered nurses in South Africa. *SA Journal of Industrial Psychology*. 2009;35(1):423. doi:10.4102/sajip.v35i1.423
9. Brooks DM, Bradt J, Eyre L, Hunt A, Dileo C. Creative approaches for reducing burnout in medical personnel. *The Arts in Psychotherapy*. 2010;37(3):255-263. doi:10.1016/j.aip.2010.05.001
10. Logid J. The Healing Power of Art: Is It Just for Patients? *Creat Nurs*. 2011;17(3):118-119. doi:10.1891/1078-4535.17.3.118
11. Sonke J, Pesata V, Arce L, Carytsas FP, Zemina K, Jokisch C. The effects of arts-in-medicine programming on the medical-surgical work environment. *Arts & Health*. 2015;7(1):27-41. doi:10.1080/17533015.2014.966313
12. Karpavičiūtė S, Macijauskienė J. The Impact of Arts Activity on Nursing Staff Well-Being: An Intervention in the Workplace. *Int J Environ Res Public Health*. 2016;13(4):435. doi:10.3390/ijerph13040435

13. Phillips C, Welcer B. Songs for the Soul: A Program to Address a Nurse's Grief. *Clin J Oncol Nurs*. 2017;21(2):145-146. doi:10.1188/17.CJON.145-146
14. Catlin A, Cobbina M, Dougherty R, Laws D. Music, Spirituality, and Caring Science: The Effect of a *Cappella* Song on Healthcare Staff in Medical–Surgical Units. *Int J Hum Caring*. 2019;23(3):234-241. doi:10.20467/1091-5710.23.3.234
15. Veiga G, Dias Rodrigues A, Lamy E, Guiose M, Pereira C, Marmeleira J. The effects of a relaxation intervention on nurses' psychological and physiological stress indicators: A pilot study. *Complementary Therapies in Clinical Practice*. 2019;35:265-271. doi:10.1016/j.ctcp.2019.03.008
16. Bianchini C, Copeland D. The Use of Mindfulness-Based Interventions to Mitigate Stress and Burnout in Nurses. *J Nurses Prof Dev*. 2021;37(2):101-106. doi:10.1097/NND.0000000000000708
17. Zamanifar S, Bagheri-Saveh MI, Nezakati A, Mohammadi R, Seidi J. The Effect of Music Therapy and Aromatherapy with Chamomile-Lavender Essential Oil on the Anxiety of Clinical Nurses: A Randomized and Double-Blind Clinical Trial. *J Med Life*. 2020;13(1):87-93. doi:10.25122/jml-2019-0105
18. Phillips CS, Volker DL, Davidson KL, Becker H. Storytelling Through Music: A Multidimensional Expressive Arts Intervention to Improve Emotional Well-Being of Oncology Nurses. *JCO Oncology Practice*. 2020;16(4):e405-e414. doi:10.1200/JOP.19.00748
19. Davis C, Cooke M, Holzhauser K, Jones M, Finucane J. The effect of aromatherapy massage with music on the stress and anxiety levels of emergency nurses. *Australasian Emergency Nursing Journal*. 2005;8(1-2):43-50. doi:10.1016/j.aenj.2005.05.001
20. Cooke M, Holzhauser K, Jones M, Davis C, Finucane J. The effect of aromatherapy massage with music on the stress and anxiety levels of emergency nurses: comparison between summer and winter. *J Clin Nurs*. 2007;16(9):1695-1703. doi:10.1111/j.1365-2702.2007.01709.x
21. Ceravolo D, Raines DA. The Impact of a Mindfulness Intervention for Nurse Managers. *J Holist Nurs*. 2019;37(1):47-55. doi:10.1177/0898010118781620
22. Semerci R, Öztürk G, Akgün Kostak M, Elmas S, İhsan Danacı A, Musbeg S. The effect of progressive muscle relaxation exercises on compassion satisfaction, burnout, and compassion fatigue of nurse managers. *Perspect Psychiatr Care*. 2020;57(3):1250-1256. doi:10.1111/ppc.12681
23. Rose J, Glass N. Community mental health nurses speak out: The critical relationship between emotional wellbeing and satisfying professional practice. *Collegian*. 2006;13(4):27-32. doi:10.1016/S1322-7696(08)60537-5

24. Cutshall S, Derscheid D, Miers AG, et al. Knowledge, Attitudes, and Use of Complementary and Alternative Therapies Among Clinical Nurse Specialists in an Academic Medical Center. *Clinical Nurse Specialist*. 2010;24(3):125-131. doi:10.1097/NUR.0b013e3181d86cd1
25. Rose J, Glass N. An Australian investigation of emotional work, emotional well-being and professional practice: an emancipatory inquiry. *Journal of Clinical Nursing*. 2010;19(9-10):1405-1414. doi:10.1111/j.1365-2702.2009.02997.x
26. Happell B, Dwyer T, Reid-Searl K, Burke KJ, Caperchione CM, Gaskin CJ. Nurses and stress: recognizing causes and seeking solutions. *J Nurs Manag*. 2013;21(4):638-647. doi:10.1111/jonm.12037
27. Jordan TR, Khubchandani J, Wiblishauser M. The Impact of Perceived Stress and Coping Adequacy on the Health of Nurses: A Pilot Investigation. *Nursing Research and Practice*. 2016;2016:1-11. doi:10.1155/2016/5843256
28. Oates J. What keeps nurses happy? Implications for workforce well-being strategies. *Nursing Management*. 2018;25(1):34-41. doi:10.7748/nm.2018.e1643
29. Tuisku K, Pulkki-Råback L, Virtanen M. Cultural events provided by employer and occupational wellbeing of employees: A cross-sectional study among hospital nurses. *Work*. 2016;55(1):93-100. doi:10.3233/WOR-162389
30. Lai HL, Li YM. The effect of music on biochemical markers and self-perceived stress among first-line nurses: a randomized controlled crossover trial: Music reduces stress. *Journal of Advanced Nursing*. 2011;67(11):2414-2424. doi:10.1111/j.1365-2648.2011.05670.x
31. Ploukou S, Panagopoulou E. Playing music improves well-being of oncology nurses. *Applied Nursing Research*. 2018;39:77-80. doi:10.1016/j.apnr.2017.11.007
32. W.J N, Sekar L, Manikandan A, et al. Mahamantra chanting as an effective intervention for stress reduction among nursing professionals—A randomized controlled study. *Advances in Integrative Medicine*. 2020;8(1):27-32. doi:10.1016/j.aimed.2020.05.007
33. Ozgundondu B, Gok Metin Z. Effects of progressive muscle relaxation combined with music on stress, fatigue, and coping styles among intensive care nurses. *Intensive and Critical Care Nursing*. 2019;54:54-63. doi:10.1016/j.iccn.2019.07.007
